# Supplementary material for: Comparative Solution Equilibrium Studies on Anticancer Estradiol-Based Conjugates and Their Copper Complexes
Source: MDPI journal article supplement (doi:10.3390/inorganics12020049), 2024-02-01
Supplement: s1 [file s1]

*Supporting Information for*

**Comparative Solution Equilibrium Studies on Anticancer**

**Estradiol-Based Conjugates and Their Copper Complexes**

Éva A. Enyedy \*, Anett Giricz, Tatsiana V. Petrasheuskaya, János P. Mészáros,  
Nóra V. May, Gabriella Spengler, Ferenc Kovács, Barnabás Molnár and Éva Frank

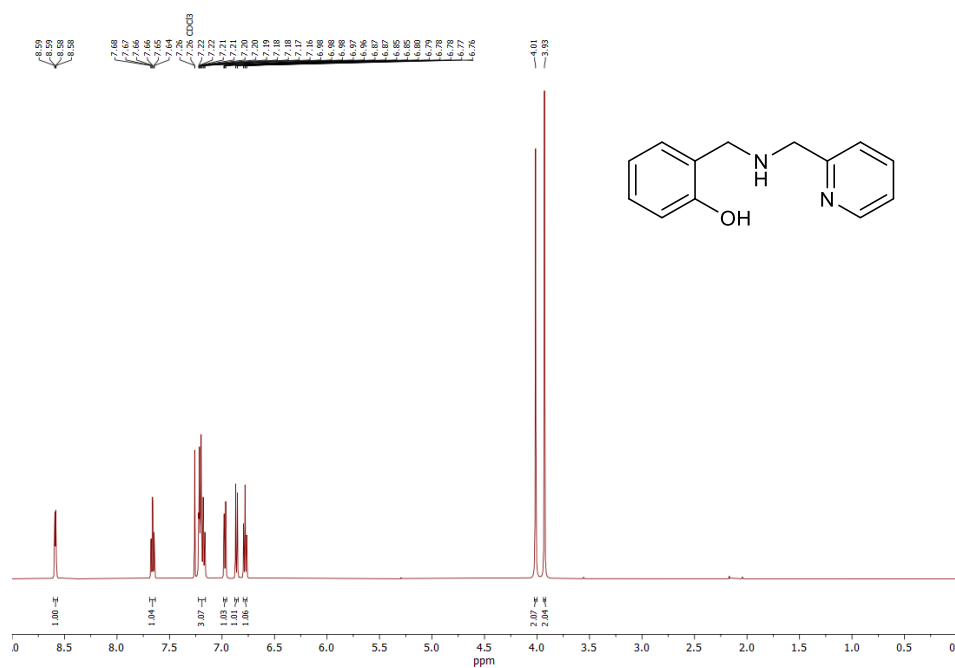

**Figure S1.** <sup>1</sup>H NMR spectrum of PMAP in CDCl<sub>3</sub>.

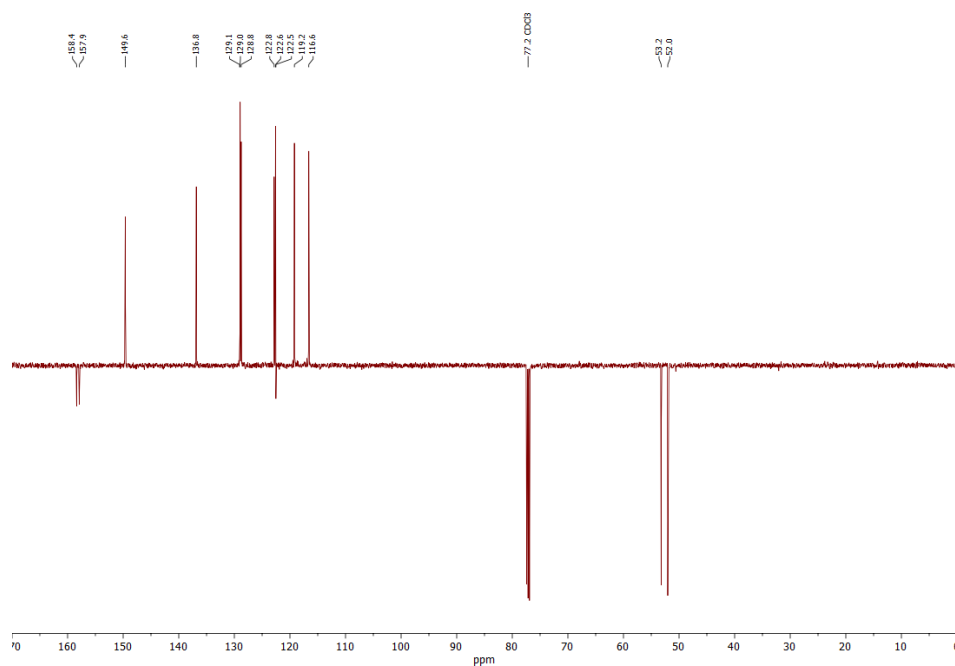

**Figure S2.** <sup>13</sup>C NMR spectrum of PMAP in CDCl<sub>3</sub>.

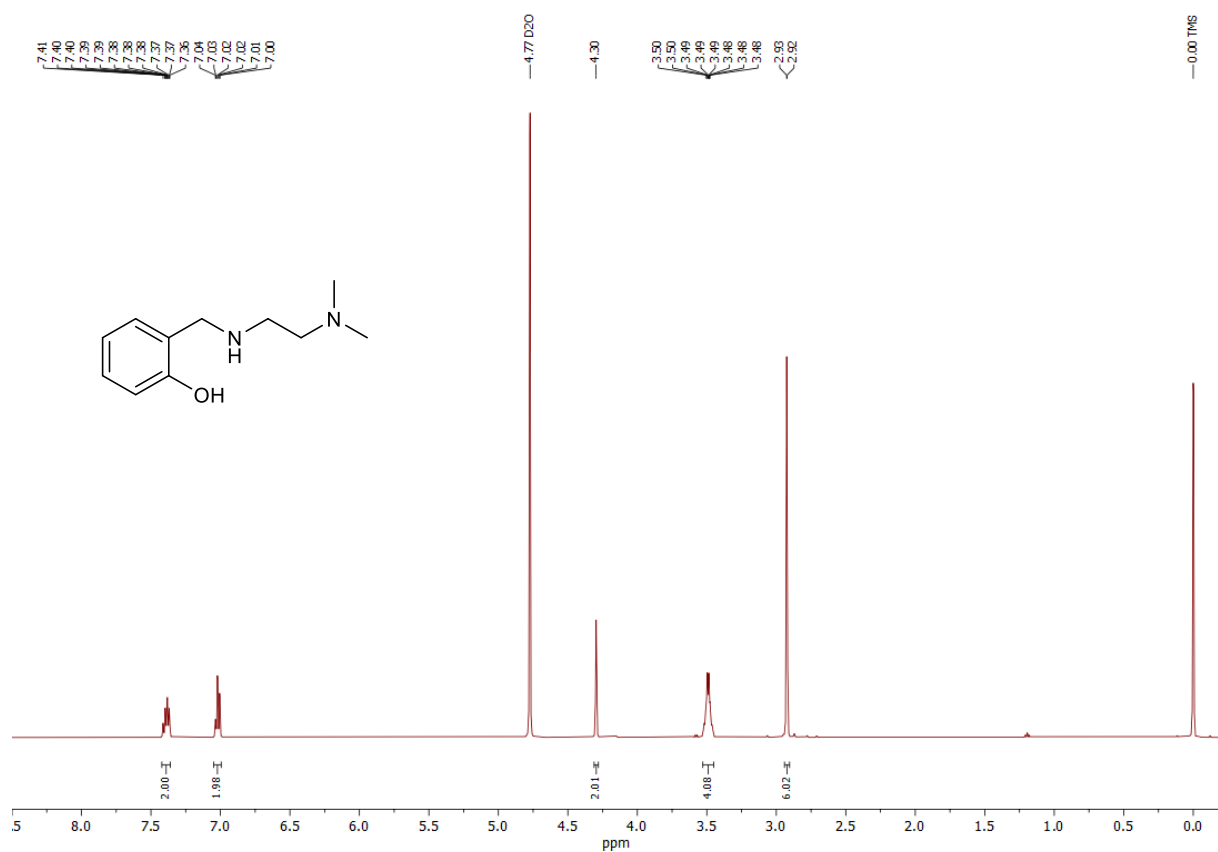

Figure S3. <sup>1</sup>H NMR spectrum of DMAP in D<sub>2</sub>O.

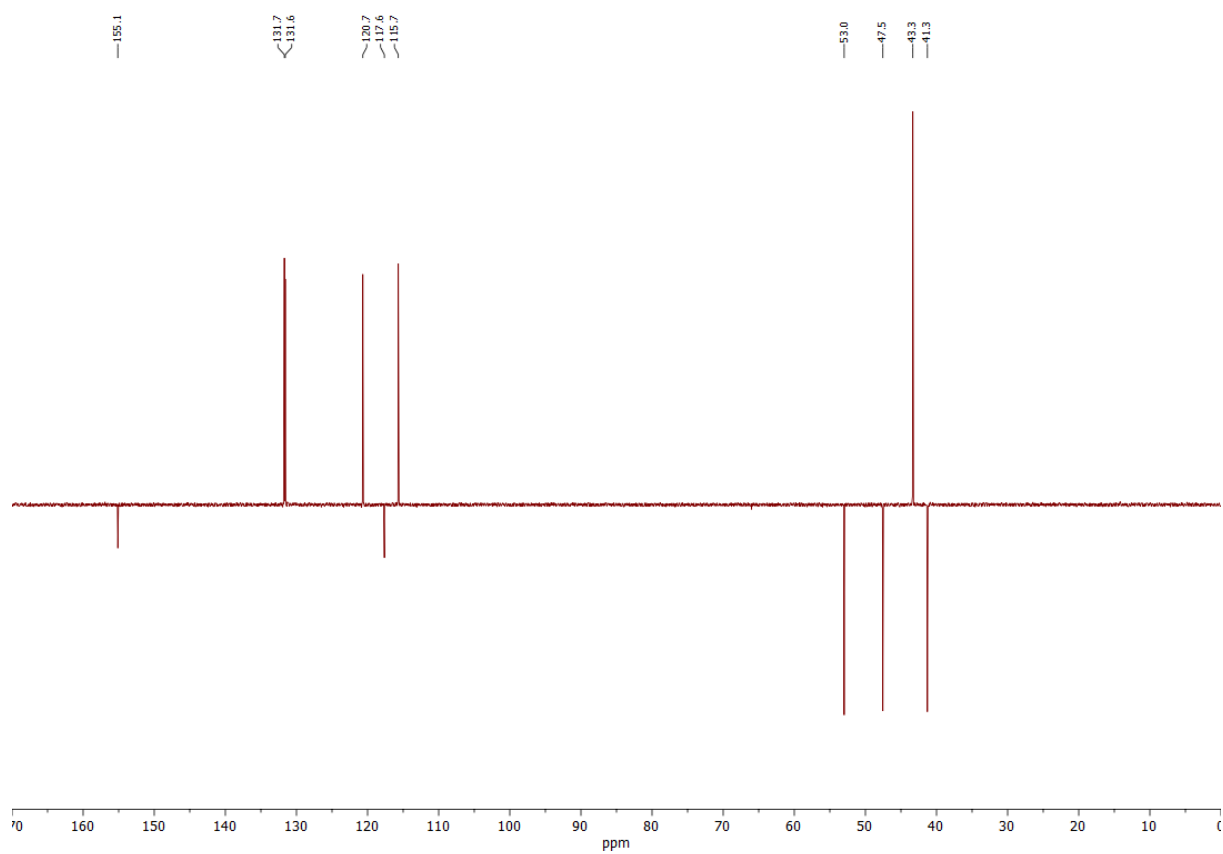

Figure S4. <sup>13</sup>C NMR spectrum of DMAP in D<sub>2</sub>O.

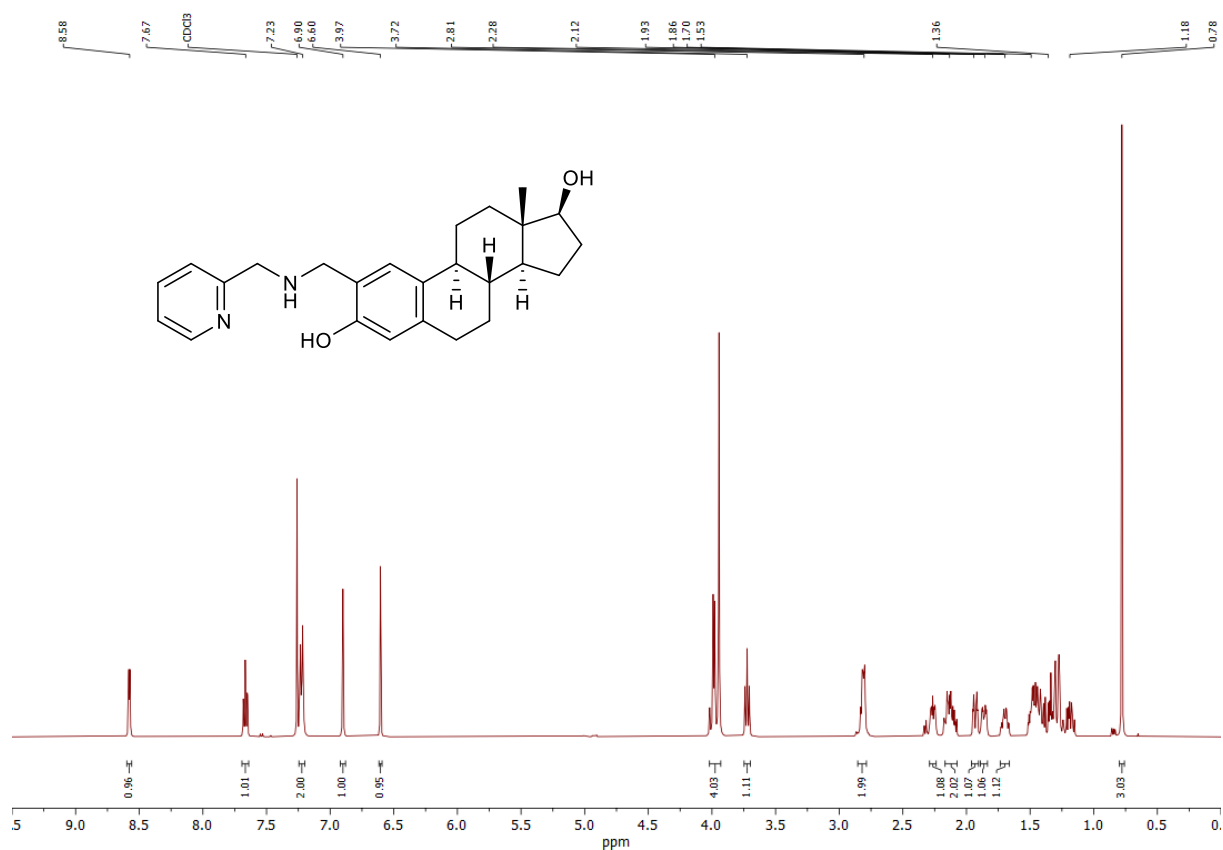

Figure S5. <sup>1</sup>H NMR spectrum of PMA-E2 in CDCl<sub>3</sub>.

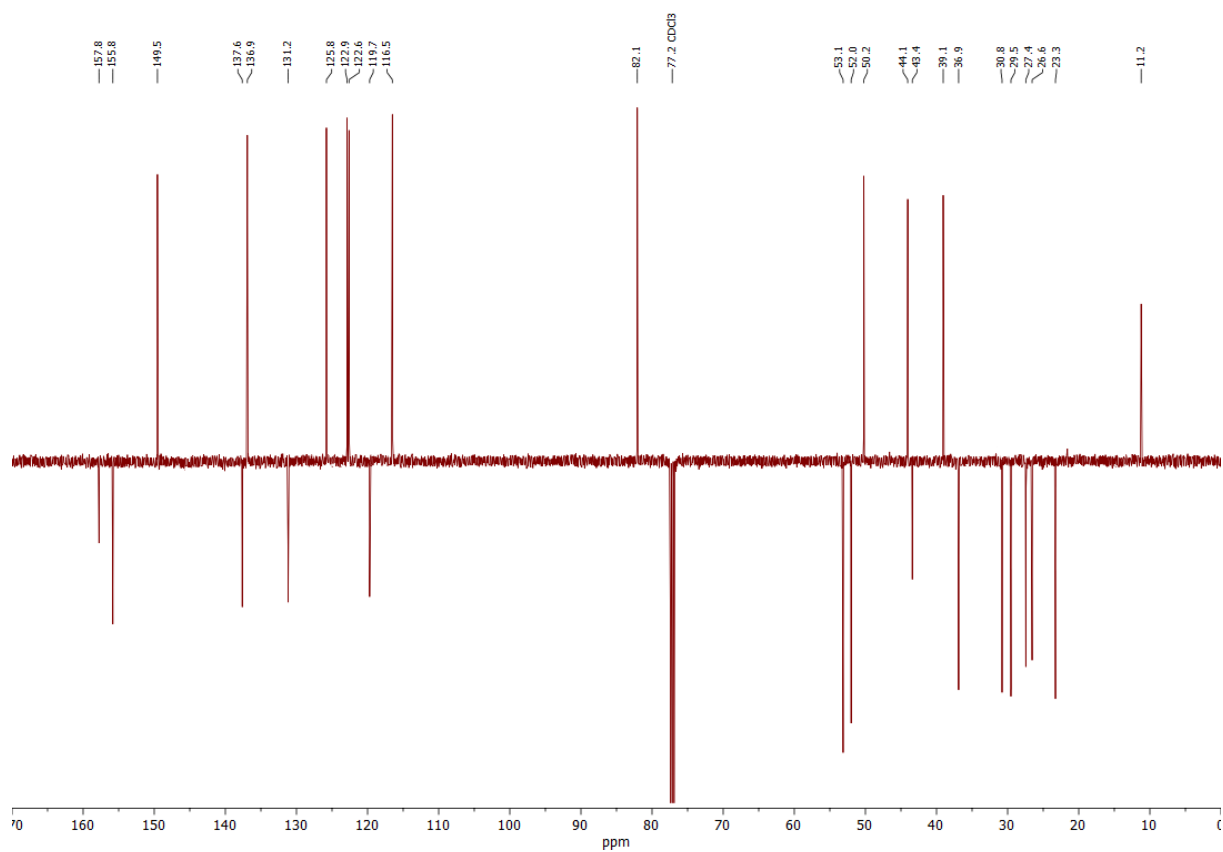

Figure S6. <sup>13</sup>C NMR spectrum of PMA-E2 in CDCl<sub>3</sub>.

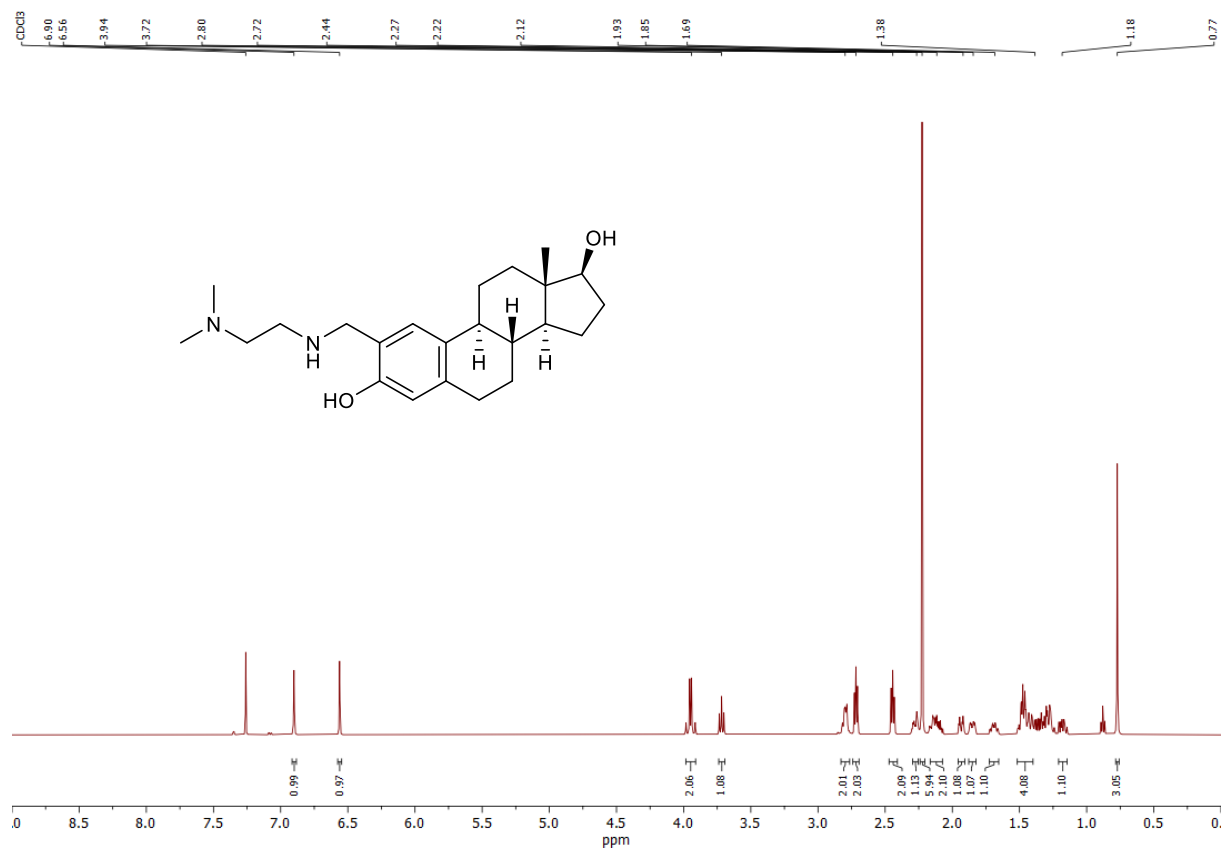

Figure S7. <sup>1</sup>H NMR spectrum of DMA-E2 in CDCl<sub>3</sub>.

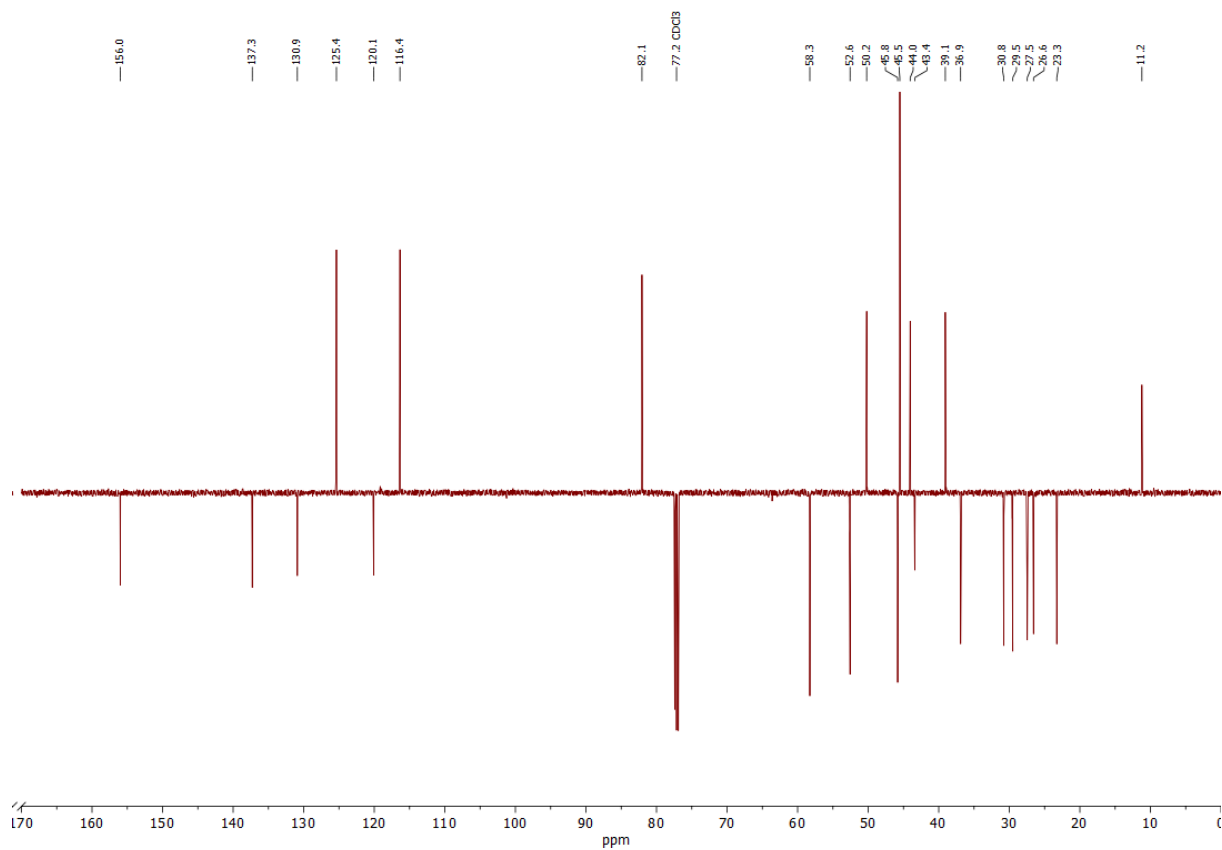

Figure S8. <sup>13</sup>C NMR spectrum of DMA-E2 in CDCl<sub>3</sub>.

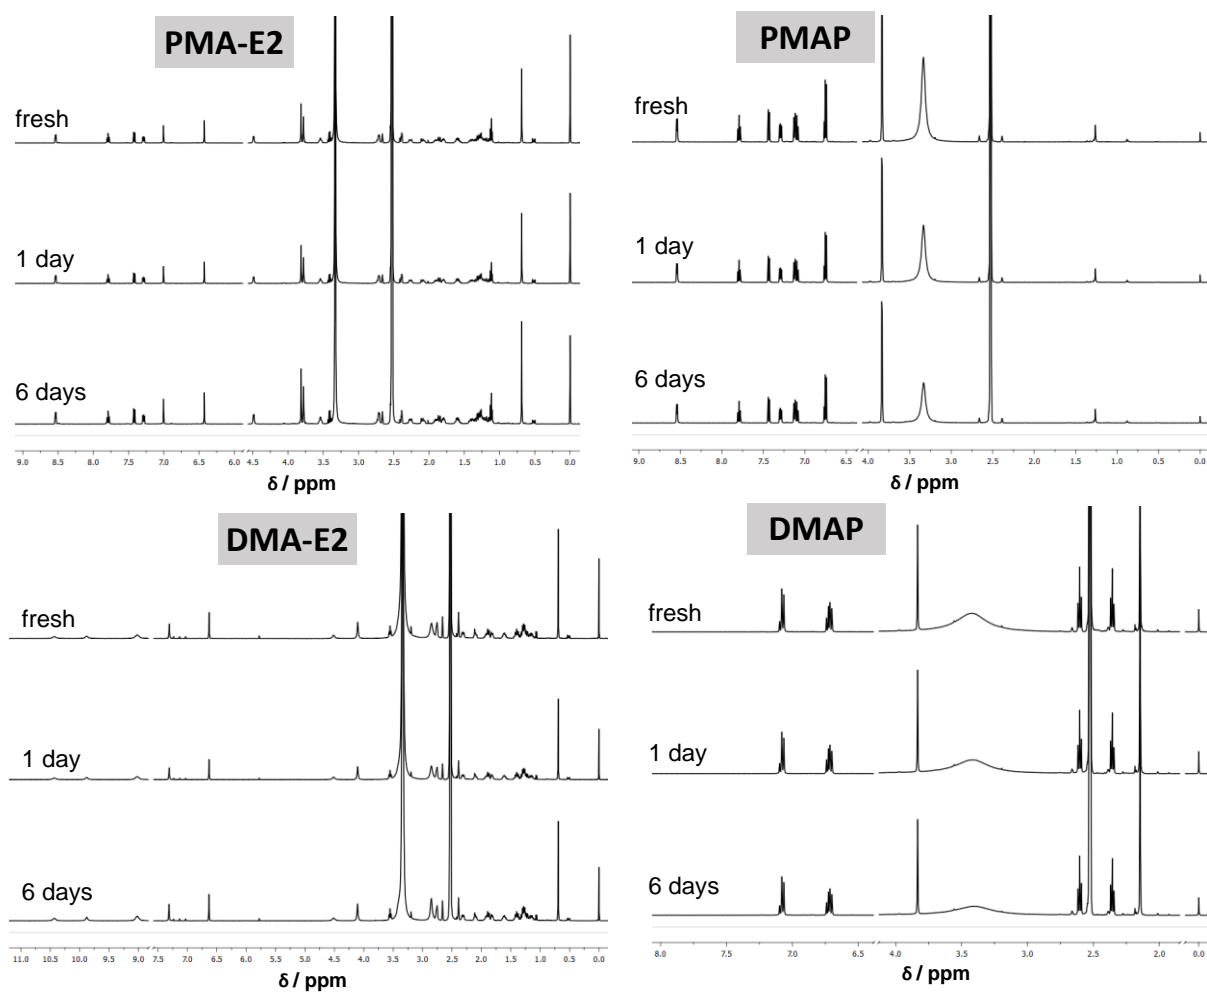

**Figure S9.**  $^1\text{H}$  NMR spectra of the studied ligands in  $d_6$ -DMSO in their fresh solution and after 1 and 6 days waiting time.

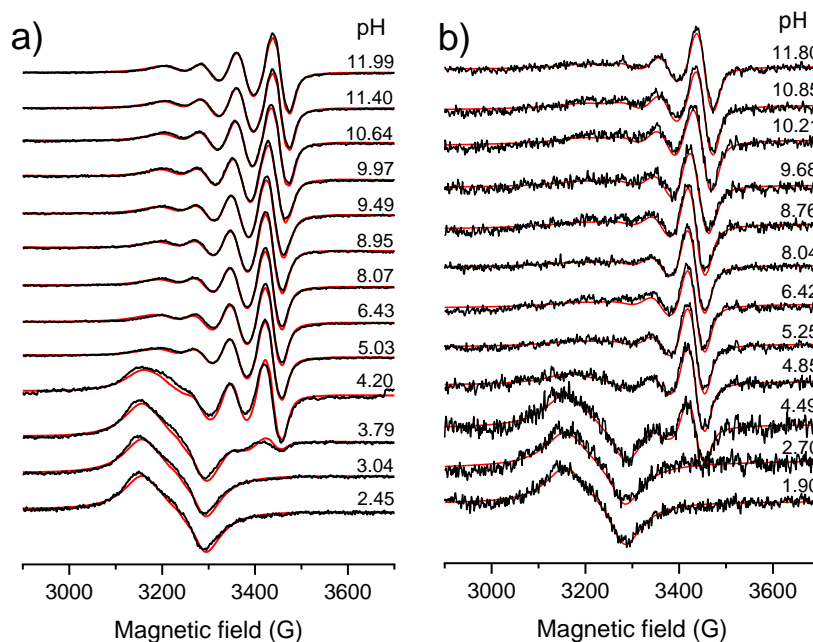

**Figure S10.** (a) pH-dependent experimental (black) and simulated (red) isotropic EPR spectra recorded for the Cu(II) – DMAP system at concentration  $c_{\text{ligand}} = 3.0$  mM and  $c_{\text{Cu(II)}} = 2.84$  mM, (b) and for Cu(II) – DMA-E2 system at concentration  $c_{\text{ligand}} = 0.55$  mM and  $c_{\text{Cu(II)}} = 0.43$  mM at 295 K. {30% (v/v) DMSO/H<sub>2</sub>O;  $I = 0.10$  M (KCl)}

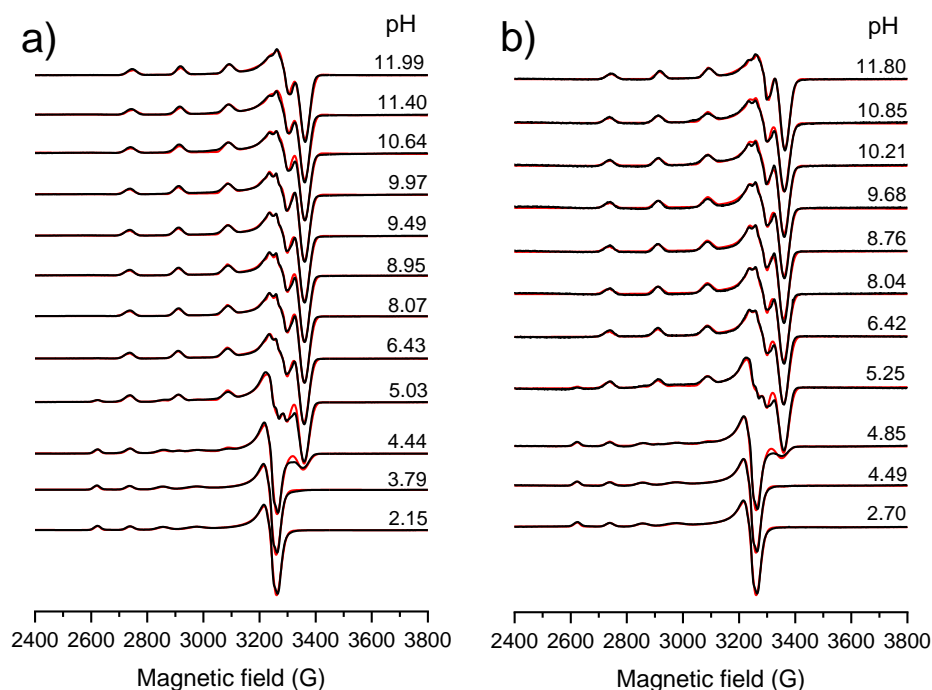

**Figure S11.** (a) pH-dependent experimental (black) and simulated (red) anisotropic EPR spectra recorded for Cu(II) – DMAP system at concentrations of  $c_{\text{ligand}} = 3.0$  mM and  $c_{\text{Cu(II)}} = 2.84$  mM, (b) and for Cu(II) – DMA-E2 system at concentrations of  $c_{\text{ligand}} = 0.55$  mM and  $c_{\text{Cu(II)}} = 0.43$  mM at 77 K. {30% (v/v) DMSO/H<sub>2</sub>O;  $I = 0.10$  M (KCl)}

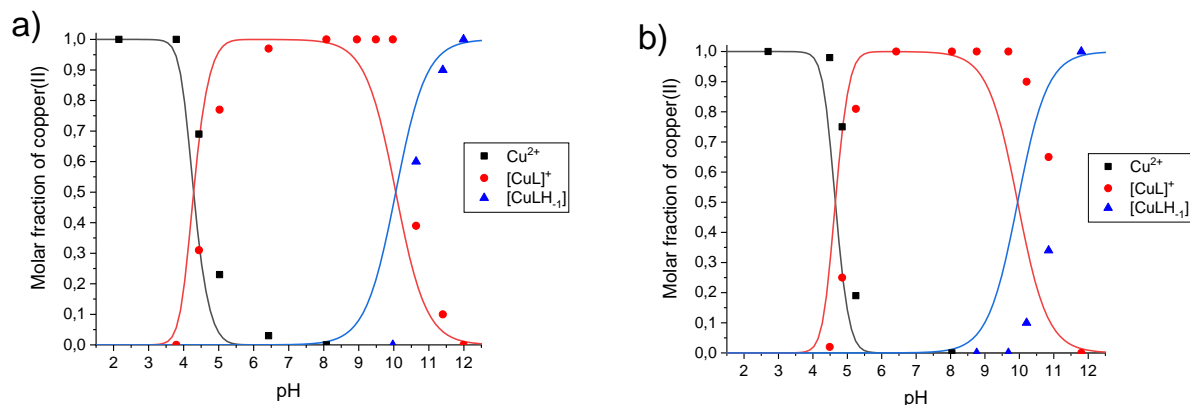

**Figure S12.** Concentration distribution curves at the concentrations of the EPR measurements using the formation constants obtained by pH-potentiometric (DMAP) or UV-vis spectrophotometric (DMA-E2) titrations (lines) and the component ratios (scatter) obtained by the simulation of frozen solution EPR spectra for (a) Cu(II) – DMAP and (b) Cu(II) – DMA-E2 systems.

**Table S1.** Electrochemical data collected for Cu(II) – DMAP, Cu(II) – DMA-E2 and Cu(II) – PMAP systems at pH 7.4 using 10 mV/s scan rate. {30% (v/v) DMF/H<sub>2</sub>O,  $c_{\text{ligand}} = 0.60$  or 0.55 mM,  $c_{\text{Cu(II)}} = 0.50$  mM; glassy carbon working electrode, Pt auxiliary electrode, Ag/AgCl/KCl (3 M) reference electrode, 0.1 M KNO<sub>3</sub> supporting electrolyte}

|                        | DMAP | DMA-E2 | PMAP |
|------------------------|------|--------|------|
| $E_c$ / mV             | −452 | −486   | −450 |
| $E_a$ / mV             | −215 | −315   | −280 |
| $\Delta E$ / mV        | 237  | 171    | 178  |
| $E_{1/2}$ / mV         | −333 | −400   | −365 |
| $E_{1/2}$ / mV vs. NHE | −123 | −190   | −155 |
| $ i_d/i_a $            | 1.22 | 1.13   | 1.00 |

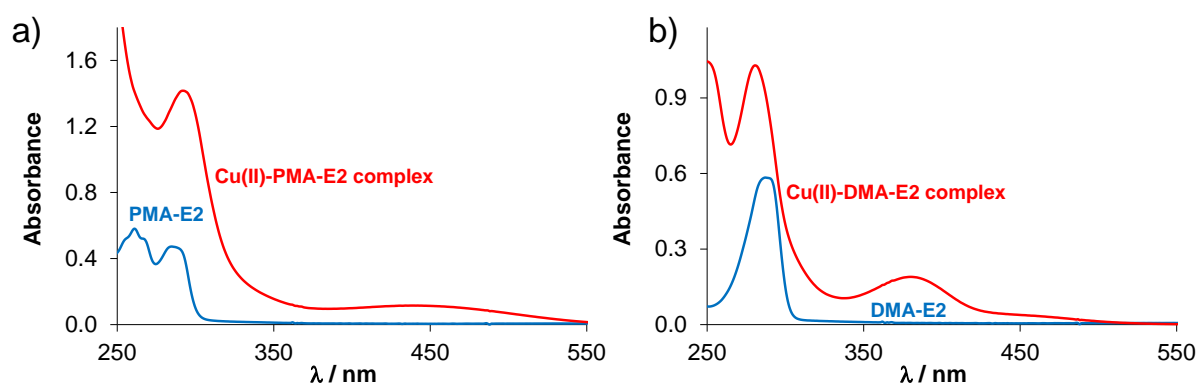

**Figure S13.** (a) UV-vis absorption spectra of PMA-E2 and its Cu(II) complex and (b) DMA-E2 and its Cu(II) complex in methanol.  $\{c_{\text{PMA}} = 170 \mu\text{M}$ ;  $c_{\text{Cu(II)-PMA}} = 230 \mu\text{M}$ ;  $c_{\text{DMA}} = 160 \mu\text{M}$ ;  $c_{\text{Cu(II)-DMA}} = 110 \mu\text{M}$ ;  $\ell = 1 \text{ cm}\}$

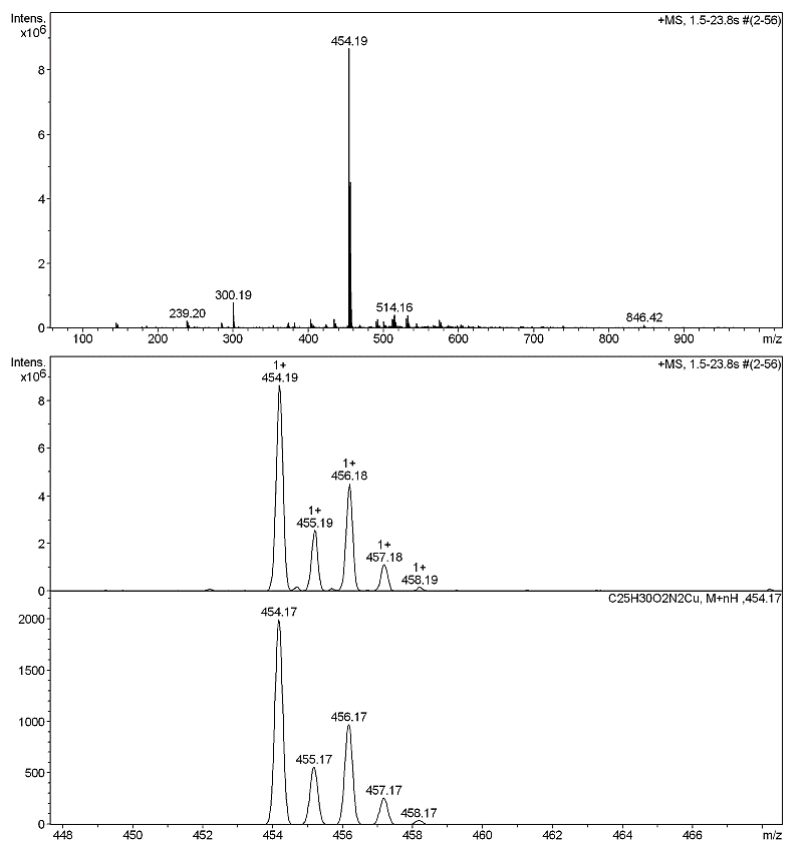

**Figure S14.** Low-resolution ESI-MS spectra of Cu(II) complex of PMA-E2 [CuLCl]. Sample was prepared in methanol (m/z [CuL]<sup>+</sup> found 454.19, calcd. 454.17 for C<sub>25</sub>H<sub>31</sub>N<sub>2</sub>O<sub>2</sub>Cu).



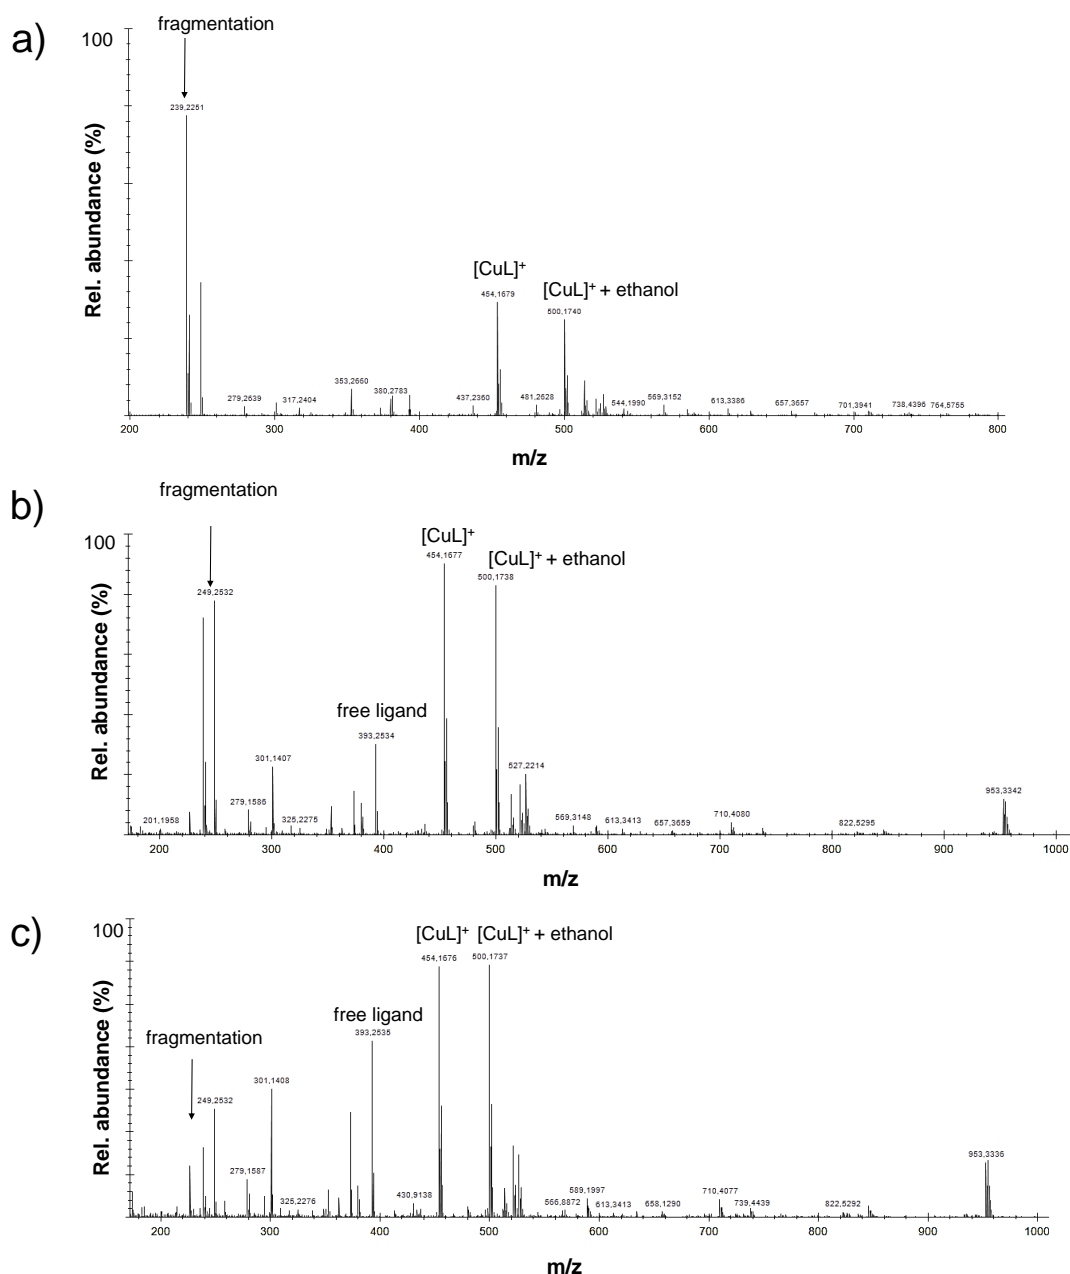

**Figure S15.** High-resolution ESI-MS spectra of Cu(II) complex of PMA-E2 [CuLCl]. Sample was prepared in methanol. **(a)** Scan time: 0.63 min. (m/z [CuL]<sup>+</sup> found 454.1679, calcd. 454.1682 for C<sub>25</sub>H<sub>31</sub>N<sub>2</sub>O<sub>2</sub>Cu; [CuL]<sup>+</sup> + ethanol found 500.1740, calcd. 500.2100 for C<sub>25</sub>H<sub>31</sub>N<sub>2</sub>O<sub>2</sub>Cu + C<sub>2</sub>H<sub>5</sub>OH). **(b)** Scan time: 0.68 min. (m/z [CuL]<sup>+</sup> found 454.1677, calcd. 454.1682 for C<sub>25</sub>H<sub>31</sub>N<sub>2</sub>O<sub>2</sub>Cu; [CuL]<sup>+</sup> + ethanol found 500.1738, calcd. 500.2100 for C<sub>25</sub>H<sub>31</sub>N<sub>2</sub>O<sub>2</sub>Cu + C<sub>2</sub>H<sub>5</sub>OH). **(c)** Scan time: 0.73 min. (m/z [CuL]<sup>+</sup> found 454.1676, calcd. 454.1682 for C<sub>25</sub>H<sub>31</sub>N<sub>2</sub>O<sub>2</sub>Cu; [CuL]<sup>+</sup> + ethanol found 500.1737, calcd. 500.2100 for C<sub>25</sub>H<sub>31</sub>N<sub>2</sub>O<sub>2</sub>Cu + C<sub>2</sub>H<sub>5</sub>OH).

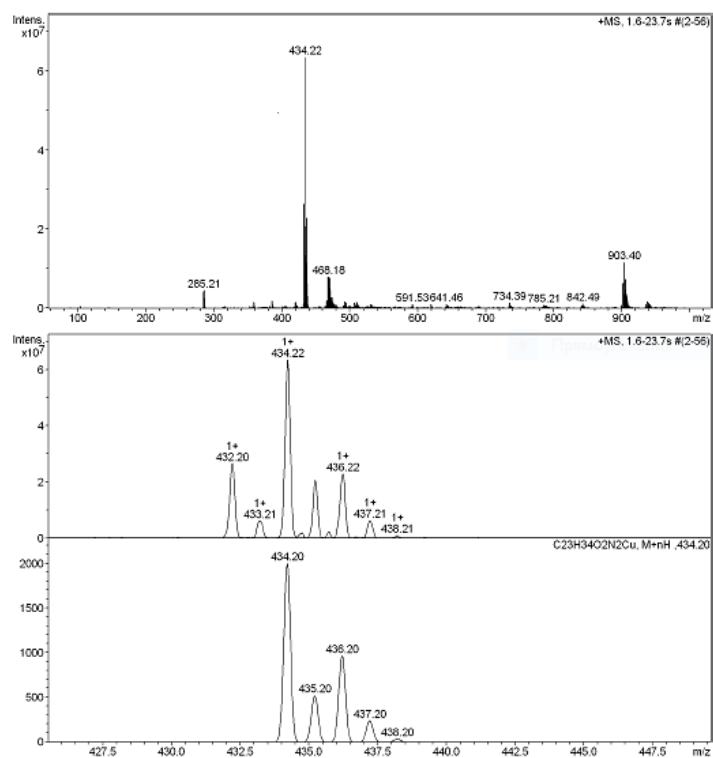

**Figure S16.** Low-resolution ESI-MS spectra of Cu(II) complex of DMA-E2 [CuLCl]. Sample was prepared in methanol ( $m/z$  [CuL]<sup>+</sup> found 434.22, calcd. 434.20 for  $C_{23}H_{35}N_2O_2Cu$ ).

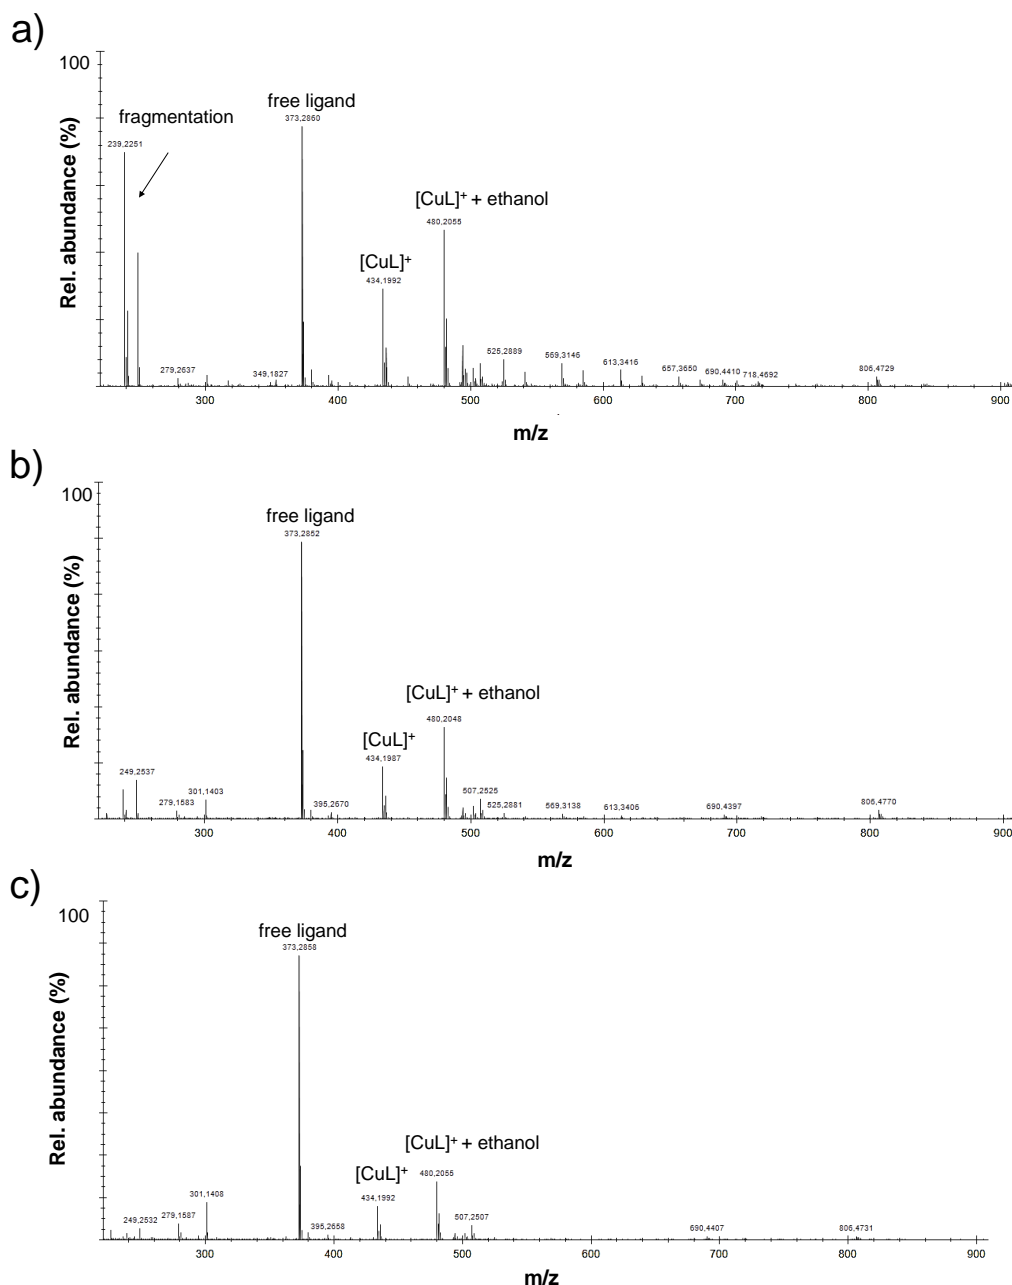

**Figure S17.** High-resolution ESI-MS spectra of Cu(II) complex of DMA-E2 [CuLCl]. Sample was prepared in methanol. **(a)** Scan time: 0.28 min. (m/z [CuL]<sup>+</sup> found 434.1992, calcd. 434.1995 for C<sub>23</sub>H<sub>35</sub>N<sub>2</sub>O<sub>2</sub>Cu; [CuL]<sup>+</sup> + ethanol found 480.2055, calcd. 480.2413 for C<sub>23</sub>H<sub>35</sub>N<sub>2</sub>O<sub>2</sub>Cu + C<sub>2</sub>H<sub>5</sub>OH). **(b)** Scan time: 0.33 min. (m/z [CuL]<sup>+</sup> found 434.1987, calcd. 434.1995 for C<sub>23</sub>H<sub>35</sub>N<sub>2</sub>O<sub>2</sub>Cu; [CuL]<sup>+</sup> + ethanol found 480.2048, calcd. 480.2413 for C<sub>23</sub>H<sub>35</sub>N<sub>2</sub>O<sub>2</sub>Cu + C<sub>2</sub>H<sub>5</sub>OH). **(c)** Scan time: 0.38 min. (m/z [CuL]<sup>+</sup> found 434.1987, calcd. 434.1992 for C<sub>23</sub>H<sub>35</sub>N<sub>2</sub>O<sub>2</sub>Cu; [CuL]<sup>+</sup> + ethanol found 480.2055, calcd. 480.2413 for C<sub>23</sub>H<sub>35</sub>N<sub>2</sub>O<sub>2</sub>Cu + C<sub>2</sub>H<sub>5</sub>OH).

NOTE: It should be noted that the DMA-E2 complex appeared exclusively in the low-resolution ESI-MS spectrum, whereas the signal of the free ligand was found in the high-resolution spectra (increased signal with increased scan time), which may be due to dissociation of the Cu(II) complex under the condition of the measurement.

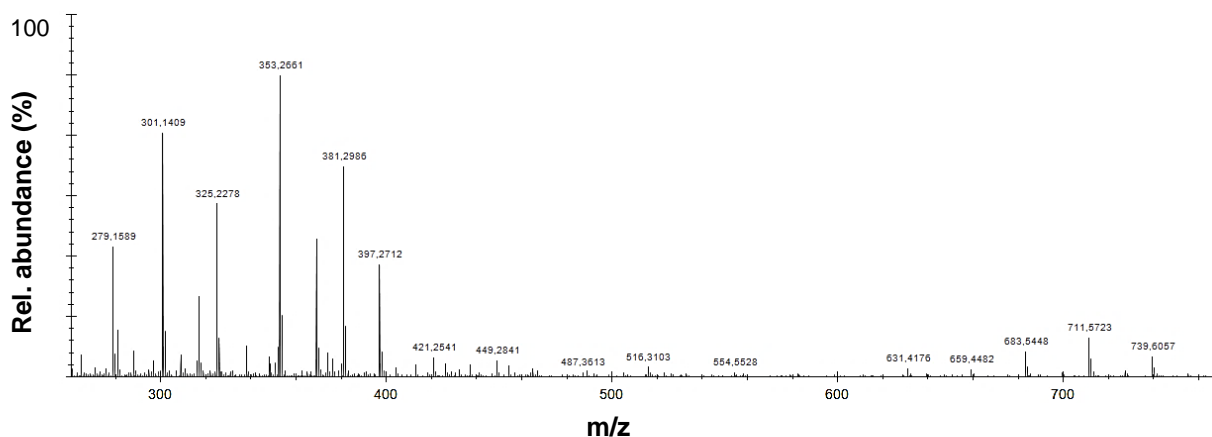

**Figure S18.** Background spectrum for the high resolution ESI-MS measurements.

**Table S2.** EPR parameters<sup>a</sup> of the complexes determined at 77 K (anisotropic) from the EPR spectra recorded for the isolated Cu(II) complex of DMA-E2 and PMA-E2, together with the parameters of [CuL]<sup>+</sup> and [CuLH-1] complexes of DMAP and reference data for Cu(II) complexes of salicylaldehyde (2-(2-hydroxybenzylidene)hydrazinecarboximidamide (SISC) [1], (E)-2-((3-aminopyridin-2-yl)methylene)hydrazinecarboxamide (oxo-triapine) [2], and the dipeptides F-cACHC [3] and F-tACHC [3] bearing (N,N,O) coordination mode.

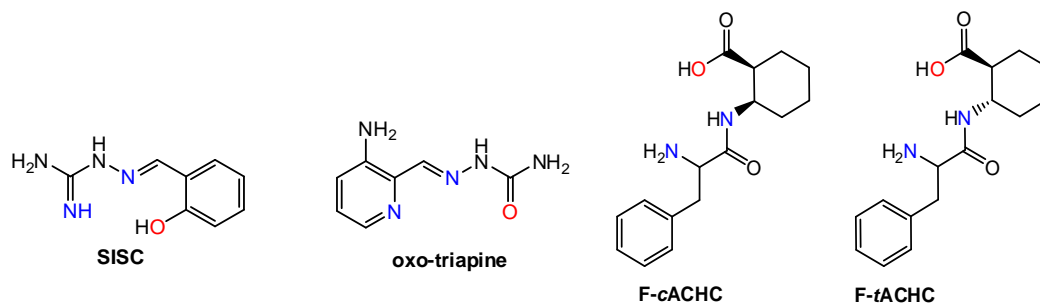

|                     | complex            | coordination mode                       | $g_x$ | $g_y$ | $g_z$ | $A_x$ | $A_y$ | $A_z$ | $g_0^{calcd}$ |
|---------------------|--------------------|-----------------------------------------|-------|-------|-------|-------|-------|-------|---------------|
| <b>DMA-E2</b>       | isolated           | (N,N,O <sup>-</sup> )                   | 2.055 | 2.055 | 2.244 | 27    | 27    | 177   | 2.118         |
| <b>PMA-E2</b>       | isolated           | (N,N,O <sup>-</sup> )                   | 2.051 | 2.051 | 2.256 | 20    | 20    | 178   | 2.119         |
| <b>DMAP</b>         | [CuL] <sup>+</sup> | (N,N,O <sup>-</sup> )                   | 2.050 | 2.050 | 2.248 | 24    | 24    | 181   | 2.116         |
|                     | [CuLH-1]           | (N,N <sup>-</sup> ,O <sup>-</sup> )     | 2.047 | 2.047 | 2.242 | 23    | 23    | 176   | 2.112         |
| <b>SISC</b>         | [CuL] <sup>+</sup> | (N,N,O <sup>-</sup> )                   | 2.034 | 2.056 | 2.248 | 19    | 22    | 174   | 2.113         |
|                     | [CuLH-1]           | (N,N,O <sup>-</sup> )(OH <sup>-</sup> ) | 2.045 | 2.048 | 2.245 | 14    | 21    | 176   | 2.113         |
| <b>oxo-triapine</b> | [CuL] <sup>+</sup> | (N,N,O <sup>-</sup> )                   | 2.054 | 2.054 | 2.255 | 16    | 16    | 156   | 2.121         |
| <b>F-cACHC</b>      | [CuLH-1]           | (N,N,O <sup>-</sup> )                   | 2.038 | 2.053 | 2.237 | 23    | 19    | 191   | 2.109         |
| <b>F-tACHC</b>      | [CuLH-1]           | (N,N,O <sup>-</sup> )                   | 2.040 | 2.057 | 2.252 | 18    | 21    | 182   | 2.116         |

<sup>a</sup> The coupling values are given in  $10^{-4} \text{ cm}^{-1}$ , the relaxation parameters are in G. The experimental error was  $\pm 0.001$  for  $g$  and  $\pm 1 \times 10^{-4} \text{ cm}^{-1}$  for  $A$  parameters. <sup>b</sup> Calculated by the equation  $g_0 = (g_x + g_y + g_z)/3$ .

## References

1. Dömötör, O.; May, N.V.; Gál, G.T.; Spengler, G.; Dobrova, A.; Arion, V.B.; Enyedy, É.A. Solution Equilibrium Studies on Salicylidene Aminoguanidine Schiff Base Metal Complexes: Impact of the Hybridization with L-Proline on Stability, Redox Activity and Cytotoxicity. *Molecules* **2022**, *27*, 2044.
2. Enyedy, É.A.; May, N.V.; Pape, V.F.S.; Heffeter, P.; Szakács, G.; Keppler, B.K.; Kowol, C.R. Complex formation and cytotoxicity of Triapine derivatives: A comparative solution study on the effect of the chalcogen atom and NH-methylation. *Dalton Trans.* **2020**, *49*, 16887–16902.
3. Nagy, N.V.; Doorslaer, S.V.; Szabó-Plánka, T.; Rompaey, S.V.; Hamza, A.; Fülöp, F.; Tóth, G.K.; Rockenbauer, A. Copper (II)-binding ability of stereoisomeric *cis*- and *trans*-2-aminocyclohexanecarboxylic acid–l-phenylalanine dipeptides. A combined cw/pulsed EPR and DFT study. *Inorg. Chem.* **2012**, *51*, 1386–1399.
